# Supplementary material for: Efficient crystallization-induced emission in fluorenyl-tethered carboranes
Source: Royal Society of Chemistry journal article supplement (doi:10.1039/c7cp02118f), 2017-01-01
Supplement: c7cp02118f1.pdf [file c7cp02118f1.pdf]

### High Resolution Mass Spectrometry (HRMS)

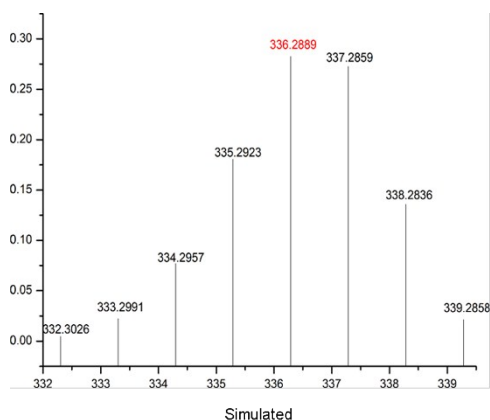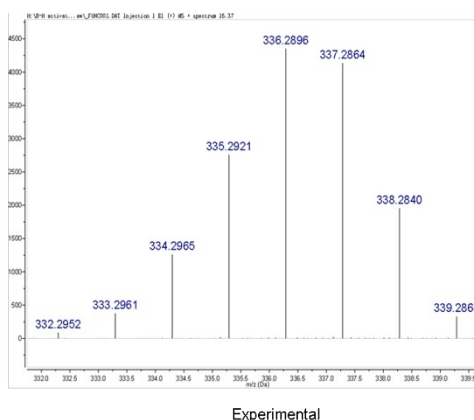

Figure S1. HRMS of mFI-Cb-H.

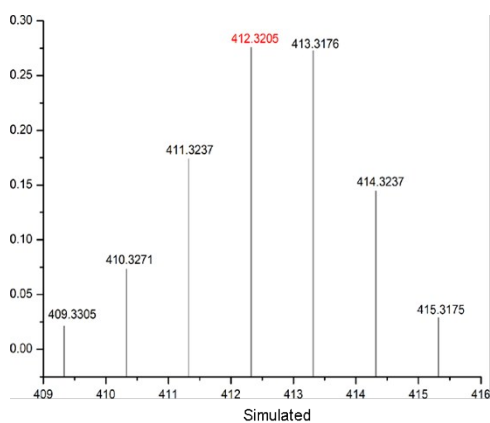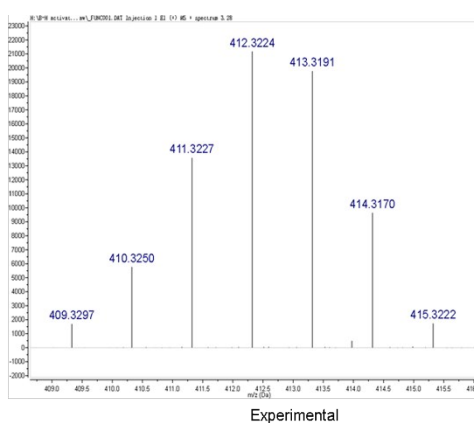

Figure S2. HRMS of mFI-Cb-Ph.

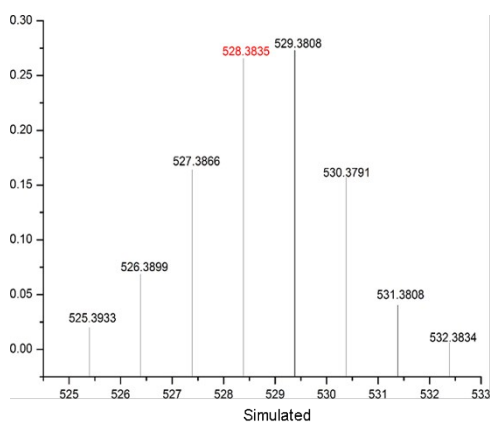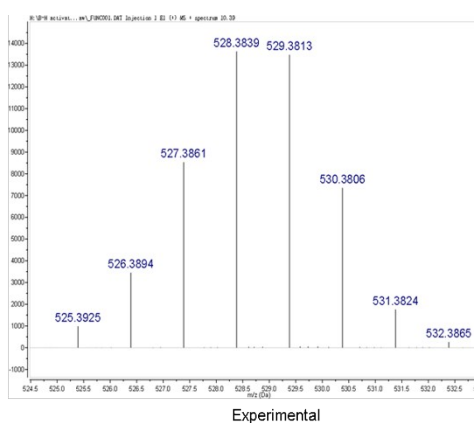

Figure S3. HRMS of DmFI-Cb.

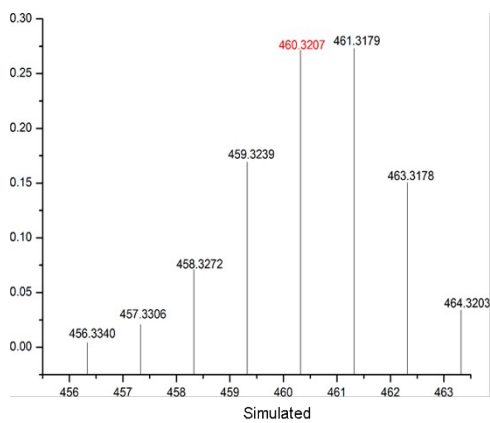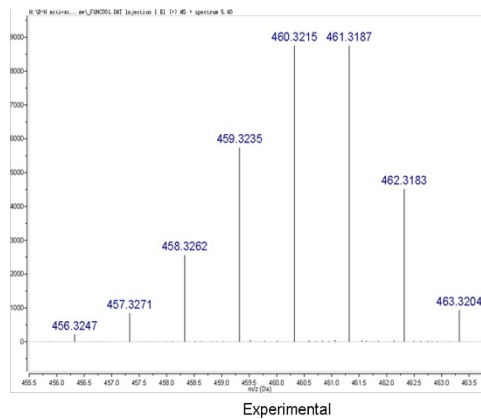

Figure S4. HRMS of pFI-Cb-H.

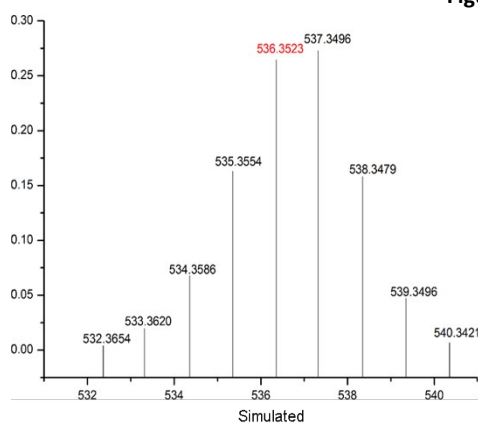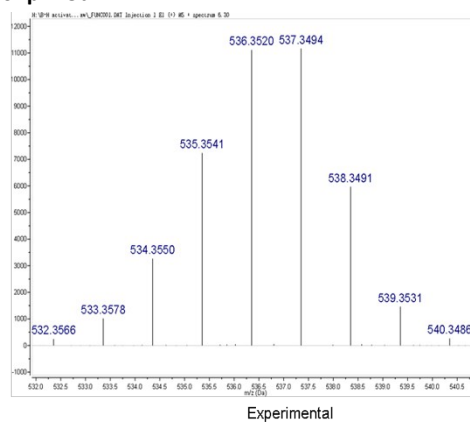

Figure S5. HRMS of pFI-Cb-Ph.

Table S1. Structural refinement data of crystals

|                       | <b>mFI-Cb-Ph*</b>                               | <b>DmFI-Cb&amp;</b>                             | <b>pFI-Cb-H#</b>                                |
|-----------------------|-------------------------------------------------|-------------------------------------------------|-------------------------------------------------|
| CCDC number           | <a href="#">1527646</a>                         | <a href="#">1527647</a>                         | <a href="#">1536124</a>                         |
| Formula               | C <sub>23</sub> H <sub>28</sub> B <sub>10</sub> | C <sub>32</sub> H <sub>36</sub> B <sub>10</sub> | C <sub>27</sub> H <sub>28</sub> B <sub>10</sub> |
| Crystal system        | triclinic                                       | triclinic                                       | tetragonal                                      |
| Space group           | P -1                                            | P -1                                            | I41/a                                           |
| a, Å                  | 10.2378(4)                                      | 10.7377(4)                                      | 29.1255(9)                                      |
| b, Å                  | 10.7582(5)                                      | 15.4048(6)                                      | 29.1255(9)                                      |
| c, Å                  | 11.6502(6)                                      | 18.3711(7)                                      | 14.6448(5)                                      |
| α(°)                  | 90.007(2)                                       | 90.481(2)                                       | 90.00                                           |
| β(°)                  | 102.099(2)                                      | 97.830(2)                                       | 90.00                                           |
| γ(°)                  | 110.257(2)                                      | 91.483(2)                                       | 90.00                                           |
| V, Å <sup>3</sup>     | 1173.35(9)                                      | 3009.3(2)                                       | 12423.1(7)                                      |
| ρ/g.cm <sup>-3</sup>  | 1.168                                           | 1.167                                           | 0.985                                           |
| Z                     | 2                                               | 4                                               | 16                                              |
| μ (mm <sup>-1</sup> ) | 0.059                                           | 0.061                                           | 0.051                                           |
| F(000)                | 432.0                                           | 1112.0                                          | 3839                                            |
| R1(reflections)       | 0.0668                                          | 0.0489                                          | 0.0890                                          |
| wR2(reflections)      | 0.1491                                          | 0.1145                                          | 0.3329                                          |
| )                     |                                                 |                                                 |                                                 |
| GOOF                  | 0.939                                           | 0.994                                           | 0.826                                           |

\* Crystals of **mFI-Cb-Ph** were grown from slow evaporation of ethanol solution

& Crystals of **DmFI-Cb** were grown from a hot methanol/ethanol (1:1) solution

# Crystals of **pFI-Cb-H** were grown from a saturated chloroform solution. Disordered lattice solvent molecules could not be modelled (even at 120K) and were therefore removed from the refinement using PLATON SQUEEZE<sup>1</sup>. The molecular structure of **pFI-Cb-H** was confirmed despite the poor diffraction data.

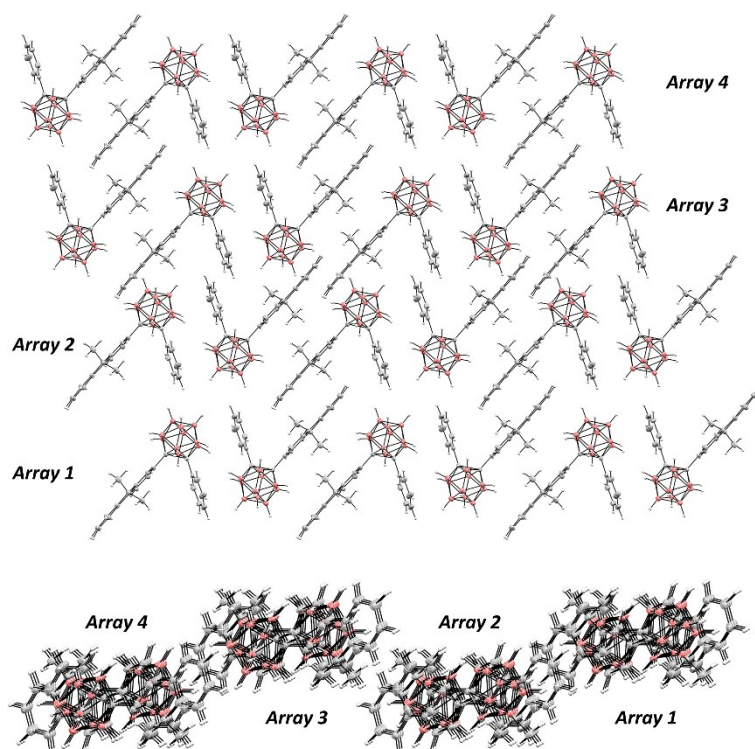

Figure S6. Crystal packing of mFI-Cb-Ph.

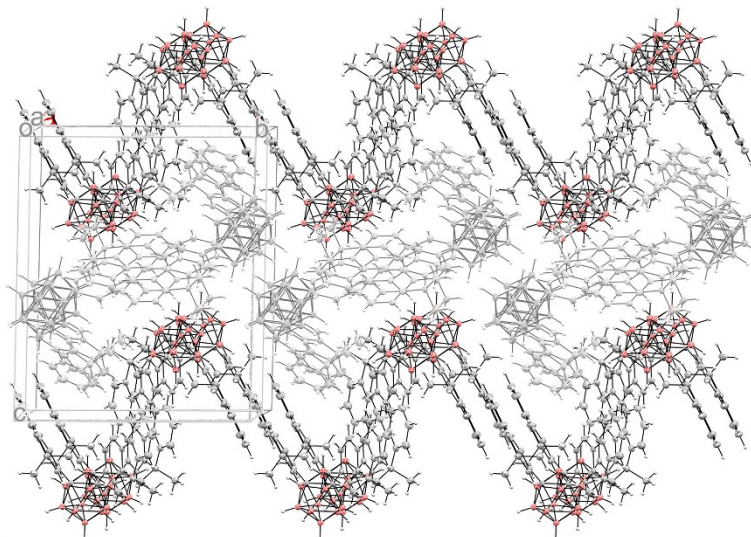

Figure S7. Crystal packing of DmFI-Cb including both *cis*- and *trans*- (gray) conformers.

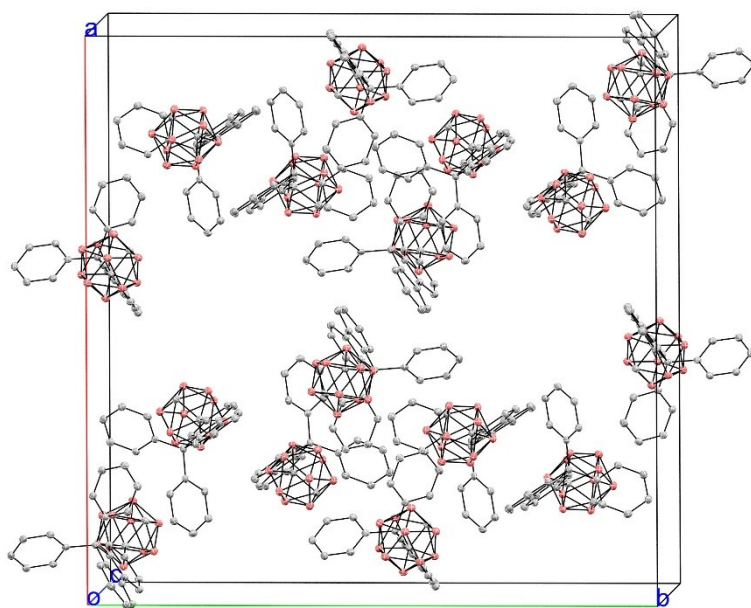

Figure S8. Unit cell of pFI-Cb-H. Hydrogens have been omitted for clarity.

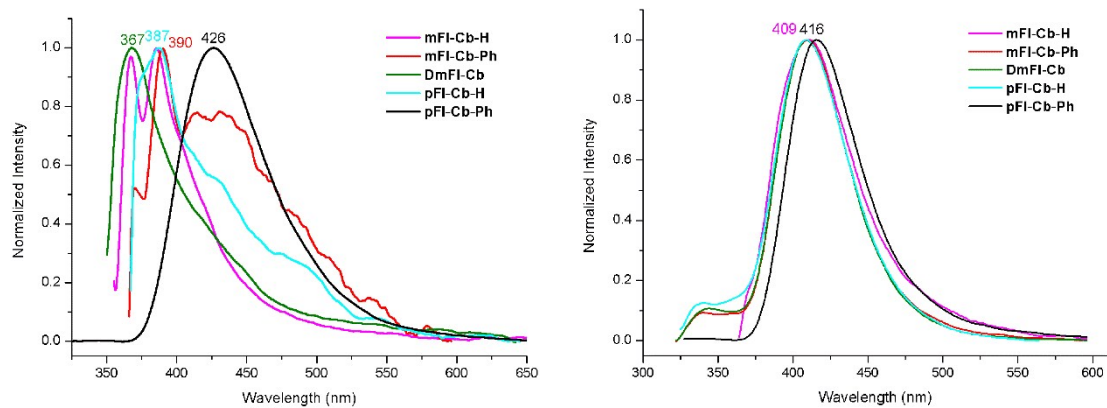

**Figure S9.** Emission spectra (excitation at 300 nm) of FI-Cb analogues in  $\text{CH}_2\text{Cl}_2$  (left) and  $\text{CH}_3\text{CN}$  (right). The quantum efficiency is around 0.1%.

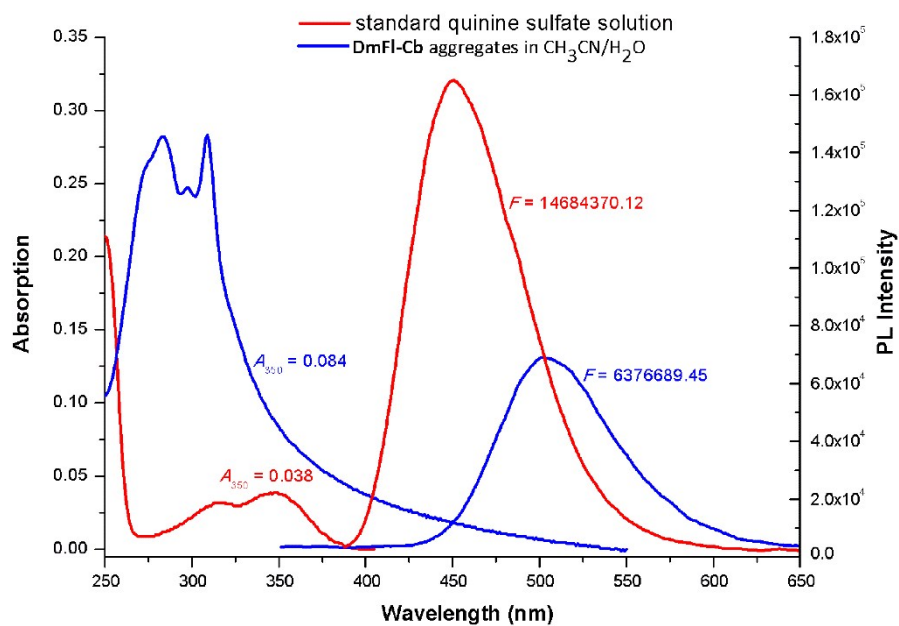

**Figure S10.** Absorption and emission spectra (excitation at 350 nm) of quinine sulfate solution and DmFI-Cb aggregates ( $10^{-5}$  mol/L) in  $\text{CH}_3\text{CN}/\text{H}_2\text{O}$  (4:6) solution. The quantum yield was estimated using quinine sulfate as a standard ( $\Phi = 0.55$ ).

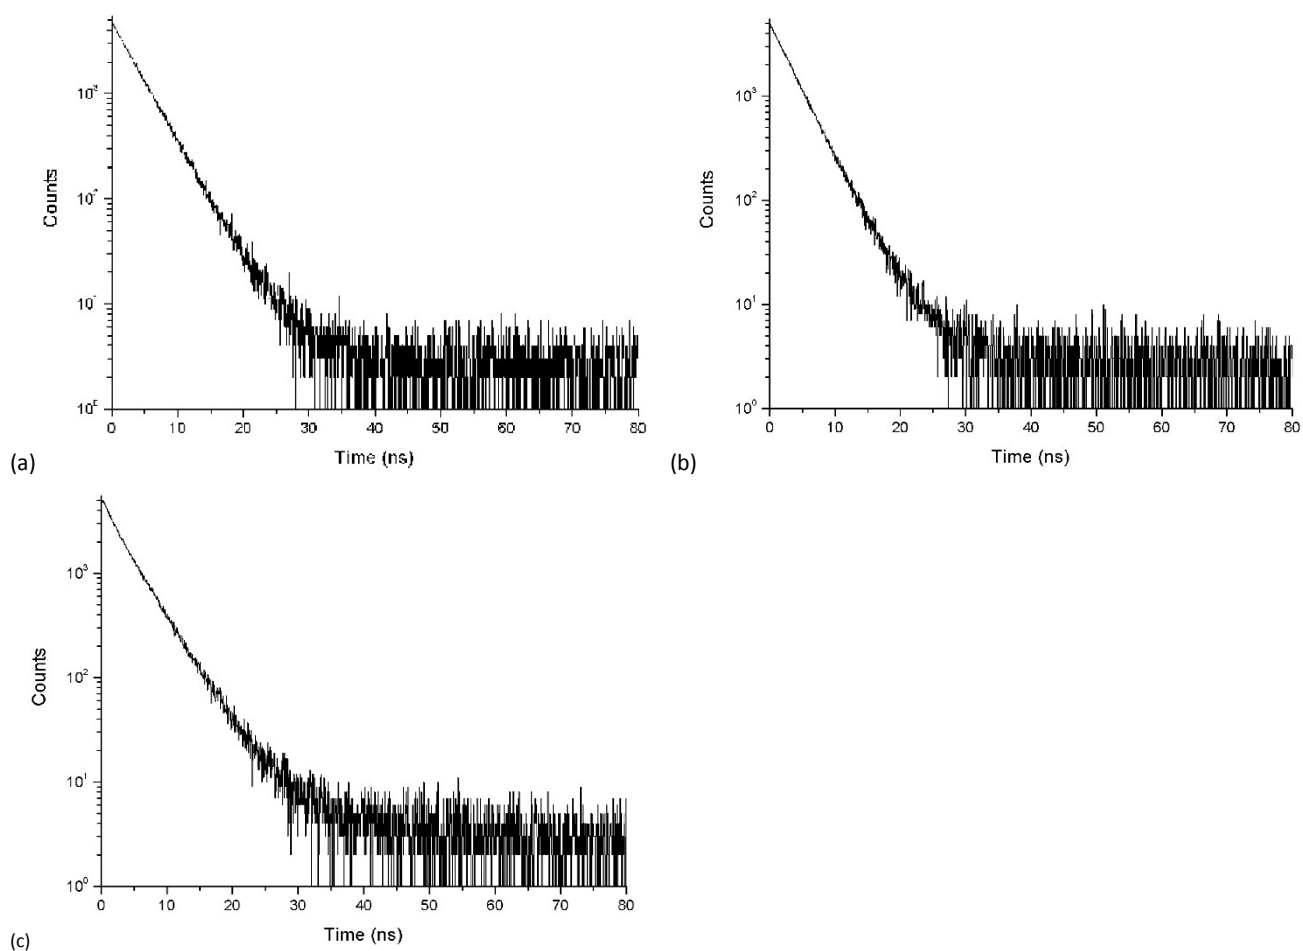

**Figure S11.** PL decay of the solid FI-Cb analogues, mFI-Cb-Ph (a), DmFI-Cb (b) and pFI-Cb-Ph (c).

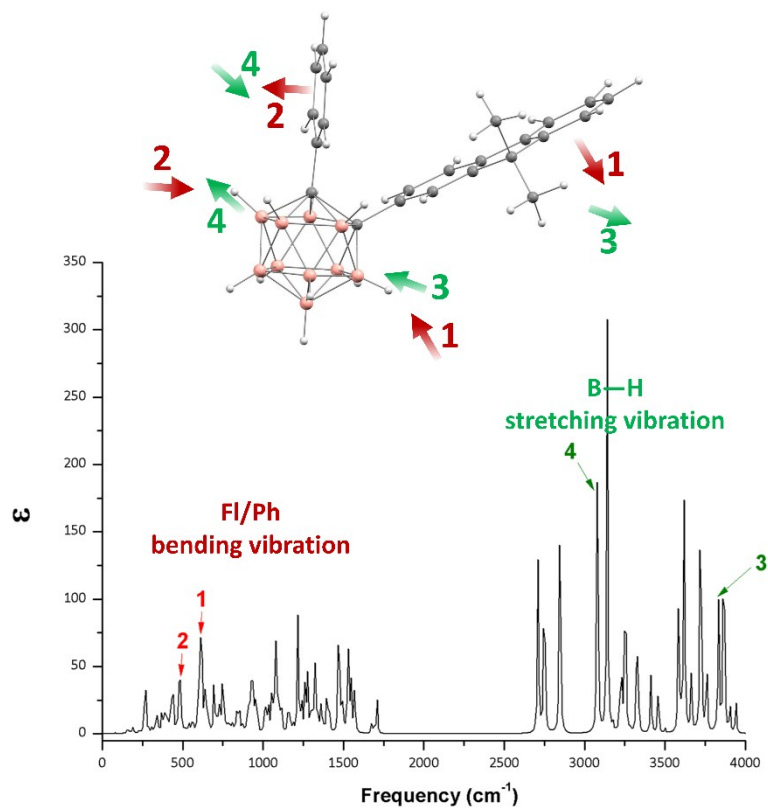

**Figure S12.** Simulated infrared spectrum of **mFI-Cb-Ph**. Selected vibrations relative to the aggregation are shown in colored arrows.

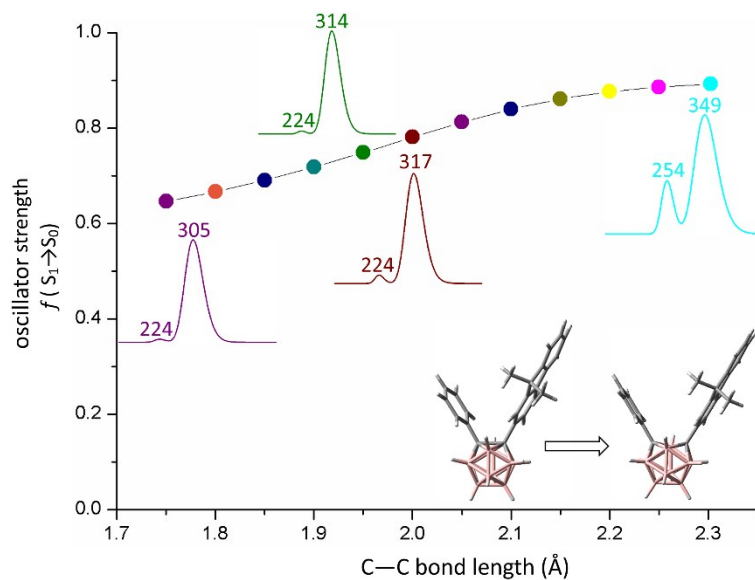

**Figure S13.** Calculated oscillator strengths ( $f$ ) of electronic transitions from different excited states ( $S_1$ ) to the ground state ( $S_0$ ) of the **mFI-Cb-Ph** monomer. Excited-state structures were obtained by TD-DFT optimization varying the cage C—C bond lengths from 1.75 Å to 2.30 Å.

**Table S2.** Calculated electronic transitions of **mFI-Cb-Ph** from the ground state to the lowest five excited states for different aggregations.

| mFI-Cb-Ph monomer               |        |                                                                                       |
|---------------------------------|--------|---------------------------------------------------------------------------------------|
| $\lambda_{\text{calc}}$<br>(nm) | $f$    | Assignment (> 5%)                                                                     |
| 261.95                          | 0.6030 | H → L (91.7%)                                                                         |
| 245.25                          | 0.0582 | H-2 → L (31.6%); H → L (5.6%); H → L+2 (41.9%); H → L+3 (11.3%)                       |
| 239.97                          | 0.0193 | H-1 → L (47.9%); H-1 → L+1 (6.2%); H-1 → L+6 (5.8%); H → L+3 (10.5%); H → L+5 (24.1%) |
| 227.08                          | 0.0032 |                                                                                       |
| 207.03                          | 0.1055 | H-3 → L (19.0%); H-3 → L+1 (31.8%); H-2 → L (9.0%); H → L+1 (21.6%)                   |
| mFI-Cb-Ph dimer-FI              |        |                                                                                       |
| $\lambda_{\text{calc}}$<br>(nm) | $f$    | Assignment (> 5%)                                                                     |
| 266.88                          | 0.0000 |                                                                                       |

| 261.52                          | 1.0051 | H-1 → L (47.7%); H → L+1 (46.3%)                                                                         |
|---------------------------------|--------|----------------------------------------------------------------------------------------------------------|
| 246.04                          | 0.0000 |                                                                                                          |
| 245.68                          | 0.1030 | H-5 → L (14.7%); H-4 → L+1 (14.7%); H-1 → L+4 (20%); H-1 → L+7 (7%); H → L+5 (19%); H → L+6 (19%)        |
| 240.85                          | 0.0000 |                                                                                                          |
| mFl-Cb-Ph dimer-Ph              |        |                                                                                                          |
| $\lambda_{\text{calc}}$<br>(nm) | $f$    | Assignment (> 5%)                                                                                        |
| 262.63                          | 1.3438 | H-1 → L (47.9%); H → L+1 (49.4%)                                                                         |
| 261.30                          | 0.0001 |                                                                                                          |
| 245.26                          | 0.1224 | H-9 → L+1 (6.9%); H-8 → L (7.2%); H-6 → L+1 (11.6%); H-5 → L (10.2%); H-1 → L+4 (25%); H → L+5 (24.6 %)  |
| 245.14                          | 0.0000 |                                                                                                          |
| 239.91                          | 0.0002 |                                                                                                          |
| mFl-Cb-Ph trimer                |        |                                                                                                          |
| $\lambda_{\text{calc}}$<br>(nm) | $f$    | Assignment (> 5%)                                                                                        |
| 266.83                          | 0.0081 |                                                                                                          |
| 262.35                          | 1.6397 | H-2 → L (65.8%); H-1 → L+1 (20.4%); H → L+2 (13.7%)                                                      |
| 261.09                          | 0.1306 | H-2 → L (35.1%); H-1 → L+1 (29.8%); H → L+2 (35.2%)                                                      |
| 245.98                          | 0.0001 |                                                                                                          |
| 245.62                          | 0.1169 | H-8 → L+1 (13.2%); H-6 → L+2 (15.4%); H-1 → L+6 (20.5%); H-1 → L+9 (7.1%); H → L+8 (27.9%)               |
| mFl-Cb-Ph tetramer              |        |                                                                                                          |
| $\lambda_{\text{calc}}$<br>(nm) | $f$    | Assignment (> 5%)                                                                                        |
| 266.97                          | 0.0156 | H-3 → L (16.1%); H-3 → L+1 (5.9%); H-2 → L (5.9%); H-2 → L+1 (16.2%); H-1 → L+2 (27.5%); H → L+3 (28.4%) |
| 266.66                          | 0.0000 |                                                                                                          |
| 262.05                          | 2.2075 | H-3 → L (20.2%); H-3 → L+1 (7.4%); H-2 → L (7.4%); H-2 → L+1 (20.2%); H-1 → L+2 (22%); H → L+3 (22.8%)   |
| 260.96                          | 0.0000 |                                                                                                          |
| 245.97                          | 0.0001 |                                                                                                          |

**Table S3.** Calculated electronic transitions of **cis-DmFl-Cb** tetramer from the ground state to the lowest five excited states.

| $\lambda_{\text{calc}}$ (nm) | $f$    | Assignment (> 4%)                                                                                                                                                                                                                |
|------------------------------|--------|----------------------------------------------------------------------------------------------------------------------------------------------------------------------------------------------------------------------------------|
| 271.86                       | 0.7101 | H-7 → L (12.2%); H-6 → L+1 (7%); H-6 → L+3 (4.2%); H-5 → L (17.9%); H-5 → L+2 (5.7%); H-5 → L+4 (10.2%); H-4 → L+1 (5.2%); H-4 → L+3 (6.5%); H-4 → L+5 (11%); H-4 → L+7 (4.4%); H-1 → L (4.4%); H-1 → L+4 (4.8%); H → L+1 (6.6%) |
| 269.53                       | 0.0000 |                                                                                                                                                                                                                                  |
| 269.39                       | 0.7311 | H-7 → L+2 (6.6%); H-6 → L+3 (4.9%); H-3 → L+2 (10.4%); H-3 → L+6 (8.2%); H-2 → L+3 (8.5%); H-2 → L+5 (5.4%); H-2 → L+7 (5.2%); H-1 → L+2 (7.4%); H-1 → L+6 (6.6%); H → L+1 (6.7%); H → L+7 (4.8%)                                |



268.25 0.0000

262.65 0.0000

**Table S4.** Selected energy levels of **mFI-Cb-Ph** for different aggregations.

|            | <i>monomer</i> | <i>dimer-Fl</i> | <i>dimer-Ph</i> | <i>trimer</i> | <i>tetramer</i> |
|------------|----------------|-----------------|-----------------|---------------|-----------------|
| <b>L+3</b> | 1.483          | 0.973           | 1.091           | 0.979         | 0.467           |
| <b>L+2</b> | 1.161          | 0.954           | 1.003           | 0.463         | 0.452           |
| <b>L+1</b> | 0.910          | 0.396           | 0.390           | 0.410         | 0.410           |
| <b>L</b>   | 0.309          | 0.387           | 0.378           | 0.380         | 0.410           |
| <b>H</b>   | -8.030         | -7.897          | -7.960          | -7.839        | -7.842          |
| <b>H-1</b> | -8.863         | -7.903          | -7.965          | -7.883        | -7.846          |
| <b>H-2</b> | -9.089         | -8.693          | -8.800          | -7.968        | -7.882          |
| <b>H-3</b> | -9.204         | -8.709          | -8.801          | -8.645        | -7.882          |

**Table S5.** Selected energy levels of **cis-DmFI-Cb** for different aggregations.

|            | <i>monomer</i> | <i>dimer</i> | <i>tetramer</i> |
|------------|----------------|--------------|-----------------|
| <b>L+7</b> | 2.137454       | 1.328732     | 0.421232        |
| <b>L+6</b> | 1.989696       | 1.31431      | 0.412797        |
| <b>L+5</b> | 1.918947       | 1.237029     | 0.376333        |
| <b>L+4</b> | 1.901803       | 1.230499     | 0.32953         |
| <b>L+3</b> | 1.437305       | 0.444906     | 0.200276        |
| <b>L+2</b> | 1.339344       | 0.399463     | 0.174697        |
| <b>L+1</b> | 0.521642       | 0.222317     | 0.115648        |
| <b>L</b>   | 0.288713       | 0.143132     | 0.071566        |
| <b>H</b>   | -7.89076       | -7.94219     | -7.97538        |
| <b>H-1</b> | -7.94572       | -8.00613     | -7.97538        |
| <b>H-2</b> | -8.8007        | -8.0113      | -8.023          |
| <b>H-3</b> | -8.84098       | -8.08722     | -8.023          |
| <b>H-4</b> | -9.0701        | -8.86465     | -8.05049        |
| <b>H-5</b> | -9.11908       | -8.92778     | -8.08341        |
| <b>H-6</b> | -9.7746        | -8.93241     | -8.12287        |
| <b>H-7</b> | -9.86494       | -8.93268     | -8.12314        |

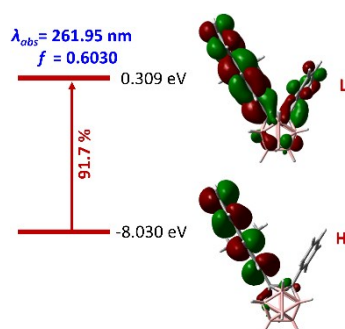

**Figure S13.** Electronic transition of the **Ph-Cb-mFI** monomer corresponding to the lowest energy absorption.

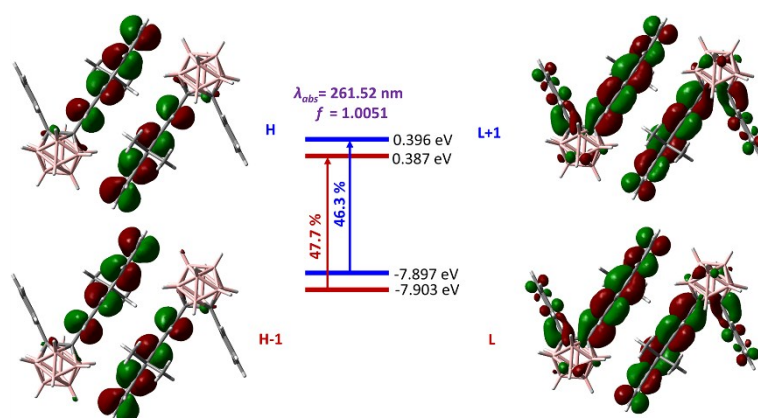

Figure S14. Electronic transition of the FI-stacked dimer **Ph-Cb-mFI** corresponding to the lowest energy absorption.

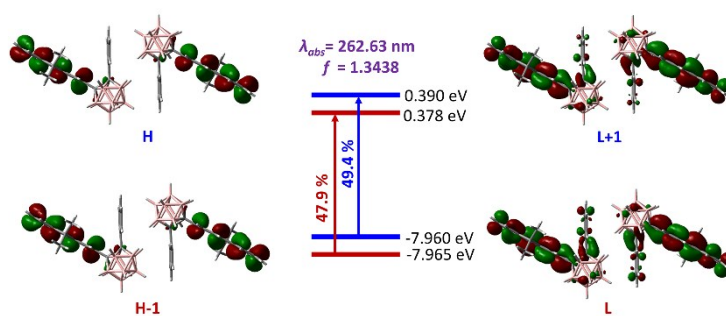

Figure S15. Electronic transition of the Ph-stacked dimer **Ph-Cb-mFI** corresponding to the lowest energy absorption.

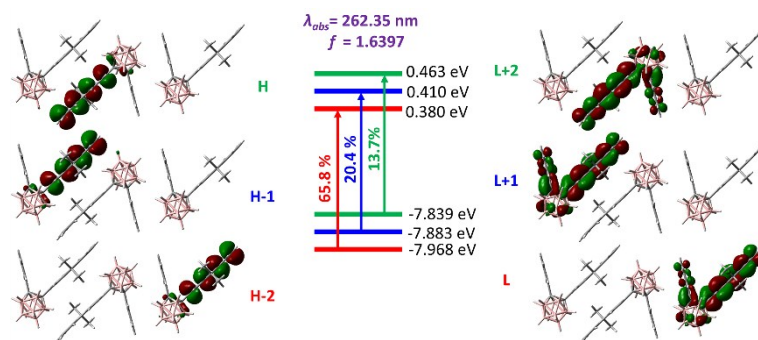

Figure S16. Electronic transition of the **Ph-Cb-mFI** trimer corresponding to the lowest energy absorption.

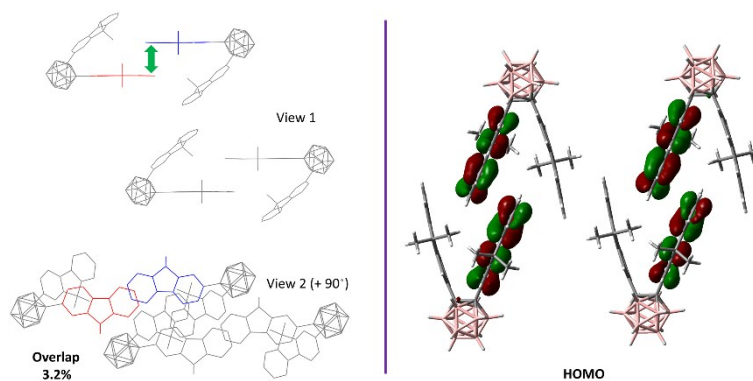

**Figure S17.** (left) Views of *cis*-DmFI-Cb illustrating the  $\pi$ -overlap. View 2 is rotated 90° compared with view 1. The overlap ratio (3.2%) was calculated with Adobe Photoshop 2017 v.18.0.1 using the integrals of overlap and FI. (right) HOMO of *cis*-DmFI-Cb.

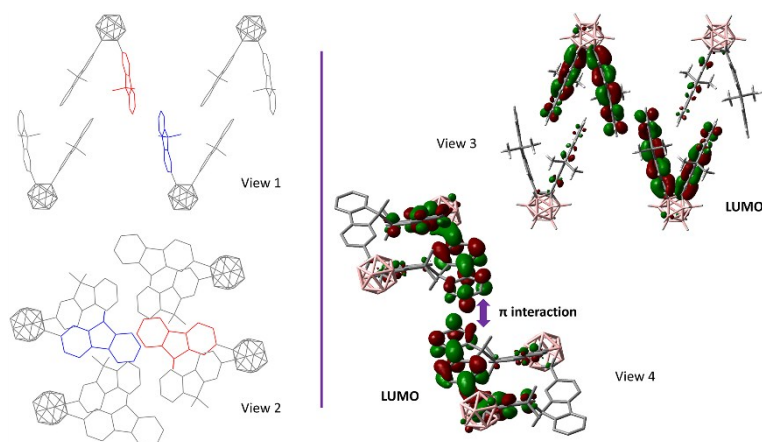

**Figure S18.** (left) Views of *cis*-DmFI-Cb emphasizing the other adjacent pair of FI moieties; no overlap is observed. (right) LUMO of *cis*-DmFI-Cb.

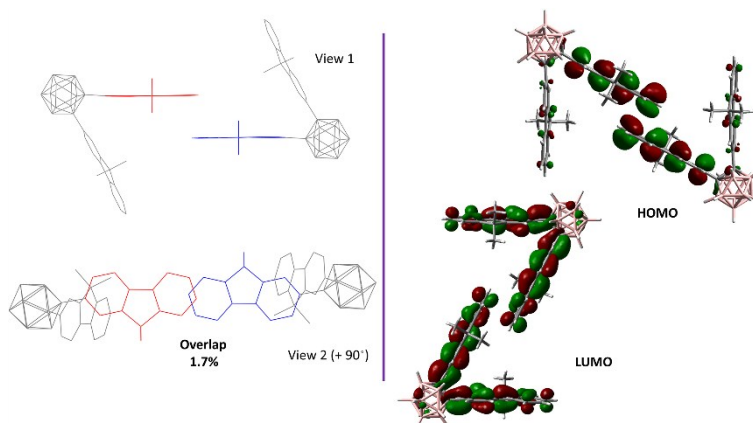

**Figure S19.** (left) Views of *trans*-DmFI-Cb illustrating adjacent FI moieties. View 2 is rotated 90° compared with view 1. The overlap ratio (1.7%) was calculated with Adobe Photoshop 2017 v.18.0.1 using the integrals of overlap and FI. (right) HOMO and LUMO of *trans*-DmFI-Cb.

## Reference

1. A.L. Spek, *Acta Crystallogr., Sect. C: Struct. Chem.*, 2015, **71**, 9.
